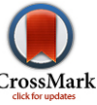

## Correction

# Correction: Dominance of Sterilization and Alternative Choices of Contraception in India: An Appraisal of the Socioeconomic Impact

## The PLOS ONE Staff

There is an error in the affiliation for the second author. The correct affiliation for José G. Dias is #3 Instituto Universitário de Lisboa (ISCTE-IUL), BRU Business Research Unit, Lisboa, Portugal.

## Reference

1. Oliveira ITd, Dias JG, Padmadas SS (2014) Dominance of Sterilization and Alternative Choices of Contraception in India: An Appraisal of the Socioeconomic Impact. PLoS ONE 9(1): e86654. doi:10.1371/journal.pone.0086654

---

**Citation:** The PLOS ONE Staff (2014) Correction: Dominance of Sterilization and Alternative Choices of Contraception in India: An Appraisal of the Socioeconomic Impact. PLoS ONE 9(6): e100050. doi:10.1371/journal.pone.0100050

**Published:** June 6, 2014

**Copyright:** © 2014 The PLOS ONE Staff. This is an open-access article distributed under the terms of the Creative Commons Attribution License, which permits unrestricted use, distribution, and reproduction in any medium, provided the original author and source are credited.
